# Supplementary material
Source: HighWire-hosted journal article supplement (http://www.cmaj.ca/highwire/filestream/59146/field_highwire_adjunct_files/0/sig-hughes-1-at.pdf)
Supplement: sig-hughes-1-at.pdf [file sig-hughes-1-at.pdf]

## **Appendix 1 (as supplied by authors): Drug interactions between antiretrovirals and anticonvulsants, corticosteroids and phosphodiesterase-5 inhibitors**

### **Anticonvulsants**

Many anticonvulsant agents are substrates as well as potent inducers of CYP3A isoenzymes. The main anticonvulsants to be aware of in this regard include carbamazepine, felbamate, oxcarbazepine, phenytoin, phenobarbital, and primidone. The potential exists for bi-directional interactions with most protease inhibitors, NNRTIs, and elvitegravir/cobicistat.<sup>1,2</sup> In healthy volunteer studies, darunavir increased the area under the concentration–time curve (AUC) of carbamazepine by 54% with little impact on darunavir pharmacokinetics<sup>3</sup> while a negative 2-way interaction was seen with phenytoin and lopinavir/ritonavir (lopinavir AUC ↓ 33% and phenytoin AUC ↓ 31%).<sup>4</sup> A negative dual interaction between carbamazepine and efavirenz was also observed in one healthy volunteer study (efavirenz AUC ↓ 36%; carbamazepine AUC ↓ 27%).<sup>5</sup> There are several case reports of patients who have experienced toxic anticonvulsant concentrations and/or subtherapeutic antiretroviral exposures with coadministration of these drugs.<sup>6–9</sup> Therefore, use of these anticonvulsants in patients on a protease inhibitor, NNRTI or elvitegravir/cobicistat therapy should be avoided and agents such as valproic acid or levetiracetam considered as an alternative. If anticonvulsant treatment cannot be modified, close monitoring and measurement of anticonvulsant and antiretroviral serum-drug concentrations is recommended. Alternatively, use of a raltegravir-based antiretroviral regimen may be considered, upon consultation with an HIV specialist, in order to ensure adequate viral potency. Tiagabine and zonisamide are also CYP3A4 substrates and concentrations may be influenced by antiretroviral therapy although data are lacking.

### **Corticosteroids**

Corticosteroids are substrates of CYP3A4, and hence are susceptible to interactions with potent CYP3A4 inhibitors such as protease inhibitors and cobicistat. In many instances, such interactions may be clinically significant, even when corticosteroids are administered via non-oral routes. There have been numerous case reports of Cushing syndrome in HIV-infected patients on both ritonavir and inhaled or intranasally administered fluticasone propionate.<sup>10–13</sup> Cases of adrenal suppression and/or Cushing syndrome have been seen with coadministration of ritonavir and injectable triamcinolone as well,<sup>14–18</sup> inhaled or oral budesonide,<sup>19–21</sup> and even corticosteroid topical eye drops and ointment.<sup>22</sup>

Therefore, caution is warranted when inhaled, intra-articular or even topical steroids are co-administered with ritonavir or cobicistat-based therapy. The use of inhaled fluticasone and ritonavir should be avoided if possible. Although budesonide is not contraindicated, based on these recent case reports, caution is warranted. If steroids are clearly indicated, ritonavir or cobicistat should be avoided and other antiretroviral options used, if feasible and in consultation with the patient's HIV care provider. If the combination of ritonavir or cobicistat and steroids is required, the lowest effective steroid dose should be used or inhaled or intranasal beclomethasone may be a preferred choice.<sup>13</sup> Close monitoring for signs and symptoms of Cushing syndrome is recommended as symptoms typically appear after several weeks and may take months to resolve once diagnosed.

### **Phosphodiesterase-5 (PDE-5) Inhibitors**

The phosphodiesterase type 5 (PDE5) inhibitors sildenafil and tadalafil are indicated for both treatment of erectile dysfunction and more recently, primary pulmonary arterial hypertension (PAH), which may be an HIV-related condition. Sildenafil exposures are increased 2 to 11-fold in the presence of protease inhibitors.<sup>2,23,24</sup> A case report of recurrent priapism secondary to an

interaction between tadalafil and boosted fosamprenavir has been reported.<sup>25</sup> For the treatment of erectile dysfunction, significant dose reductions of sildenafil and tadalafil are necessary in the context of protease inhibitor or cobicistat therapy. According to product labelling, vardenafil is contraindicated with strong CYP3A4 inhibitors including protease inhibitors.<sup>26</sup> Given the marked effect of protease inhibitors and cobicistat on increasing sildenafil exposures, as well as the higher daily dose required for chronic treatment of PAH, sildenafil for treatment of PAH is contraindicated with all protease inhibitors as well as cobicistat.<sup>2</sup> Tadalafil may be used for treatment of PAH with appropriate dosing adjustments.<sup>2</sup> Etravirine has been shown to reduce sildenafil exposures by 57% in healthy volunteers.<sup>27</sup> The potential for similar interactions between other NNRTIs and all PDE5 inhibitors exists. Thus, close monitoring is warranted if coadministration is necessary, with dose adjustment of the PDE5 inhibitor as necessary based on response.

## References

1. Birbeck GL, French JA, Perucca E, et al. Evidence-based guideline: Antiepileptic drug selection for people with HIV/AIDS: report of the Quality Standards Subcommittee on the American Academy of Neurology and the Ad Hoc Task Force of the Commission on Therapeutic Strategies of the International League Against Epilepsy. *Neurology* 2012;78:139-45.
2. Liedtke MD, Lockhart SM, Rathbun RC. Anticonvulsant and antiretroviral interactions. *Ann Pharmacother* 2004;38:482-9.
3. Sekar V, Tomaka F, Lavreys L, et al. Pharmacokinetic interaction between darunavir in combination with low-dose ritonavir (DRV/r) and carbamazepine (CBZ) [abstract TUPE0083]. Presented at: The XVII International AIDS Conference; 2008, August 3-8; Mexico City, Mexico.
4. Lim ML, Min SS, Eron JJ, et al. Coadministration of lopinavir/ritonavir and phenytoin results in two-way drug interaction through cytochrome P-450 induction. *J Acquir Immune Defic Syndr* 2004;36:1034-40.
5. Ji P, Damle B, Xie J, et al. Pharmacokinetic interaction between efavirenz and carbamazepine after multiple dose administration in healthy subjects. *J Clin Pharmacol* 2008;48:948-56.

6. Foisy MM, Ahmed R, Chiu I, et al. Managing complex anticonvulsant-antiretroviral drug interactions [abstract P098]. Presented at: The 21st Annual Conference on HIV/AIDS Research; 2012, April 19-22; Montreal, QC. *Can J Infect Dis Med Microbiol* 2012;23(suppl A):72A.
7. Bates DE, Herman RJ. Carbamazepine toxicity induced by lopinavir/ritonavir and nelfinavir. *Ann Pharmacother* 2006;40:1190-5.
8. Hugen PW, Burger DM, Brinkman K, et al. Carbamazepine-indinavir interaction causes antiretroviral therapy failure. *Ann Pharmacother* 2000;34:465-70.
9. Juba KM, Weiland D. Seizure management in a complex hospice patient. *J Pain Palliat Care Pharmacother* 2010;24:27-32.
10. Valin N, De Castro N, Garrait V, et al. Cushing's syndrome in HIV-infected patients receiving ritonavir and inhaled fluticasone: description of 4 new cases and review of the literature. *J Int Assoc Physicians AIDS Care (Chic)* 2009;8:113-21.
11. Health Canada. Important safety information regarding a drug interaction between fluticasone propionate (Flonase/Flovent/Advair) and ritonavir (Norvir/Kaletra) Available at: <http://healthycanadians.gc.ca/recall-alert-rappel-avis/hc-sc/2004/14261a-eng.php> (accessed April 7, 2014).
12. Saberi P, Phengrasamy T, Nguyen DP. Inhaled corticosteroid use in HIV-positive individuals taking protease inhibitors: a review of pharmacokinetics, case reports and clinical management. *HIV Med* 2013;14:519-29.
13. Foisy MM, Yakiwchuk EMK, Chiu I, et al. Adrenal suppression and Cushing's syndrome secondary to an interaction between ritonavir and fluticasone: a review of the literature. *HIV Med* 2008;9:389-96.
14. Hall JJ, Hughes CA, Foisy MM, et al. Iatrogenic Cushing syndrome after intra-articular triamcinolone in a patient receiving ritonavir boosted darunavir. *Int J STD AIDS* 2013;24:748-52.
15. Dort K, Padia S, Wispelwey B, et al. Adrenal suppression due to an interaction between ritonavir and injected triamcinolone: a case report. *AIDS Res Ther* 2009;6:10.
16. Yombi JC, Maiter D, Belkhir L, et al. Iatrogenic Cushing's syndrome and secondary adrenal insufficiency after a single intra-articular administration of triamcinolone acetate in HIV-infected patients treated with ritonavir. *Clin Rheumatol* 2008;27(Suppl 2):S79-82.
17. Danaher PJ, Salsbury TL, Delmar JA. Metabolic derangement after injection of triamcinolone into the hip of an HIV-infected patient receiving ritonavir. *Orthopedics* 2009;32:450.
18. Ramanathan R, Pau AK, Busse KH, et al. Iatrogenic Cushing syndrome after epidural triamcinolone injections in an HIV type 1-infected patient receiving therapy with ritonavir-lopinavir. *Clin Infect Dis* 2008;47:e97-9.
19. Kedem E, Shahar E, Hassoun G, et al. Iatrogenic Cushing's syndrome due to coadministration of ritonavir and inhaled budesonide in an asthmatic human immunodeficiency virus infected patient. *J Asthma* 2010;47:830-1.

20. Gray D, Roux P, Carrihill M, et al. Adrenal suppression and Cushing's syndrome secondary to ritonavir and budesonide. *S Afr Med J* 2010;100:296-7.
21. Frankel JK, Packer CD. Cushing's syndrome due to antiretroviral-budesonide interaction. *Ann Pharmacother* 2011;45:823-4.
22. Molloy A, Matheson NJ, Meyer PA, et al. Cushing's syndrome and adrenal axis suppression in a patient treated with ritonavir and corticosteroid eye drops. *AIDS* 2011;25:1337-9.
23. Muirhead GJ, Wulff MB, Fielding A, et al. Pharmacokinetic interactions between sildenafil and saquinavir/ritonavir. *Br J Clin Pharmacol* 2000;50:99-107.
24. Aschmann YZ, Kummer O, Linka A, et al. Pharmacokinetics and pharmacodynamics of sildenafil in a patient treated with human immunodeficiency virus protease inhibitors. *Ther Drug Monit* 2008;30:130-4.
25. Loulergue P, Gaillard R, Mir O. Interaction involving tadalafil and CYP3A4 inhibition by ritonavir. *Scand J Infect Dis* 2011;43:239-40.
26. Levitra™ (vardenafil) Product Monograph. Bayer Inc.; Toronto, ON:2011.
27. Kakuda TN, Schöller-Gyüre M, Hoetelmans RM. Pharmacokinetic interactions between etravirine and non-antiretroviral drugs. *Clin Pharmacokinet* 2011;50:25-39.
